# Supplementary material for: Identification of Imprinted Genes Based on Homology: An Example of Fragaria vesca
Source: PubMed Central journal article supplement (PMC7999015; doi:10.3390/genes12030380), 2021-03-08
Supplement: genes-12-00380-s001.pdf [file genes-12-00380-s001.pdf]

**Table S1.** SNP information of candidate gene between *F. vesca* 10-41 and 18-86.

| Accession number | Gene name       | SNP loci | SNP differential base |       |
|------------------|-----------------|----------|-----------------------|-------|
|                  |                 |          | 10-41                 | 18-86 |
| XP_004302175.1   | <i>FvARI8</i>   | 435      | T                     | C     |
| XP_004306305.1   | <i>FvCAL</i>    | 406      | G                     | A     |
|                  |                 | 426      | T                     | G     |
|                  |                 | 57       | C                     | R     |
|                  |                 | 174      | G                     | T     |
|                  |                 | 192      | C                     | A     |
|                  |                 | 345      | G                     | T     |
|                  |                 | 390      | C                     | T     |
|                  |                 | 447      | T                     | G     |
|                  |                 | 558      | C                     | T     |
|                  |                 | 654      | T                     | C     |
|                  |                 | 657      | A                     | G     |
| XP_011467948.1   | <i>FvKHDP-2</i> | 849      | G                     | A     |
|                  |                 | 879      | G                     | C     |
|                  |                 | 885      | C                     | T     |
|                  |                 | 894      | A                     | T     |
|                  |                 | 1023     | C                     | T     |
|                  |                 | 1041     | G                     | A     |
|                  |                 | 1080     | T                     | C     |
|                  |                 | 1299     | C                     | A     |
|                  |                 | 1437     | C                     | T     |
|                  |                 | 1477     | G                     | A     |
|                  |                 | 69       | T                     | C     |
|                  |                 | 278      | G                     | A     |
|                  |                 | 336      | G                     | A     |
|                  |                 | 374      | C                     | A     |
|                  |                 | 402      | A                     | G     |
|                  |                 | 409      | G                     | A     |
|                  |                 | 510      | T                     | C     |
|                  |                 | 513      | A                     | G     |
| XP_004289907.1   | <i>FvDRIP2</i>  | 525      | A                     | T     |
|                  |                 | 549      | G                     | T     |
|                  |                 | 577      | A                     | C     |
|                  |                 | 780      | G                     | A     |
|                  |                 | 792      | C                     | T     |
|                  |                 | 807      | C                     | T     |
|                  |                 | 815      | T                     | C     |
|                  |                 | 902      | A                     | G     |
|                  |                 | 1108     | A                     | G     |
| XP_004293392.1   | <i>FvBRO1</i>   | 142      | G                     | A     |
|                  |                 | 678      | T                     | C     |
|                  |                 | 268      | G                     | T     |
| XP_004298676.1   | <i>FvLTP3</i>   | 308      | C                     | G     |
|                  |                 | 329      | G                     | T     |
|                  |                 | 314      | A                     | T     |
| XP_004290481.1   | <i>FvTAR4</i>   | 354      | T                     | C     |
|                  |                 | 454      | G                     | A     |

|      |   |   |
|------|---|---|
| 654  | A | G |
| 807  | T | C |
| 933  | A | T |
| 948  | A | G |
| 1014 | G | C |
| 1083 | G | A |
| 1105 | C | T |
| 1324 | A | C |

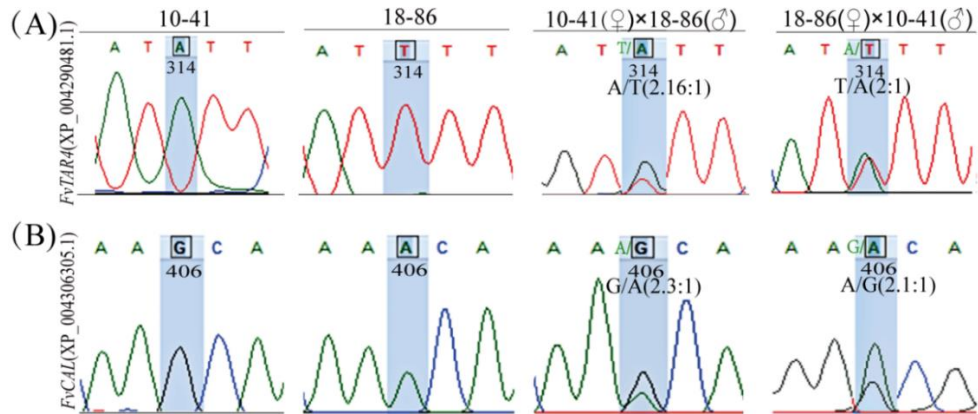

**Figure S1.** *FvTAR4* and *FvCAL* are biallelic expressions in the endosperms of the hybrid of two *Fragaria vesca* ecotypes. Sequencing of (A) *FvTAR4* and (B) *FvCAL* was used to confirm imprinting status in 10-41 × 18-86 and 18-86 × 10-41. At least ten colonies were sequenced for each amplicon. SNP sites are shaded in blue. *FvTAR4* and *FvCAL* showing a biallelic expression, and their variation ratio of SNPs is close to the 2:1 expected ratio in reciprocal cross.

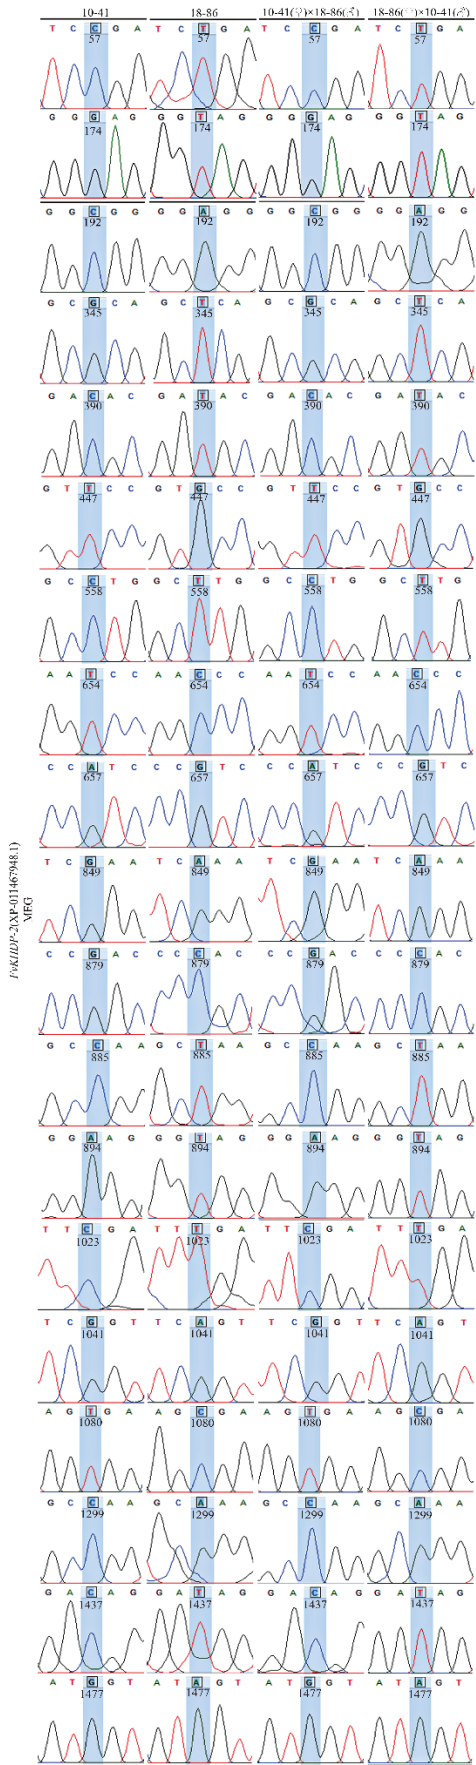

Figure S2. Monallelic expression of *FvKHDP-2* in reciprocal cross endosperm of two *Fragaria vesca* strains.

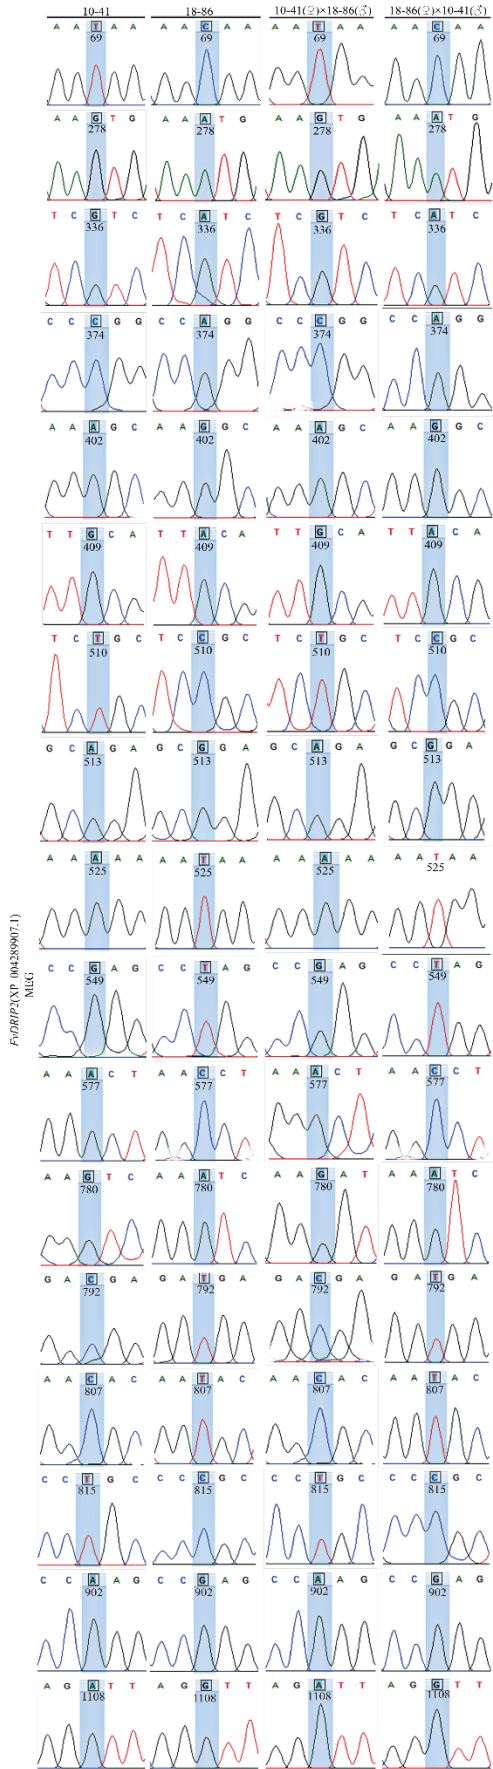

Figure S3. Monolallelic expression of *FvDRIP2* in reciprocal cross endosperm of two *Fragaria vesca* strains.

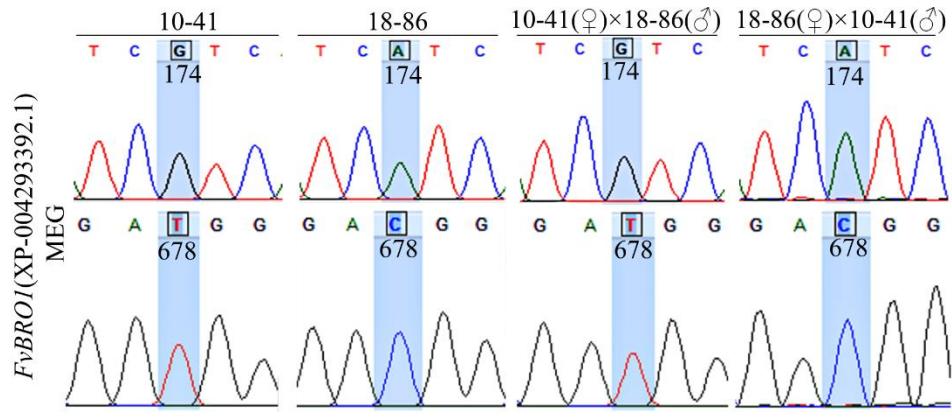

Figure S4. Monallelic expression of *FvBRO1* in reciprocal cross endosperm of two *Fragaria vesca* strains.

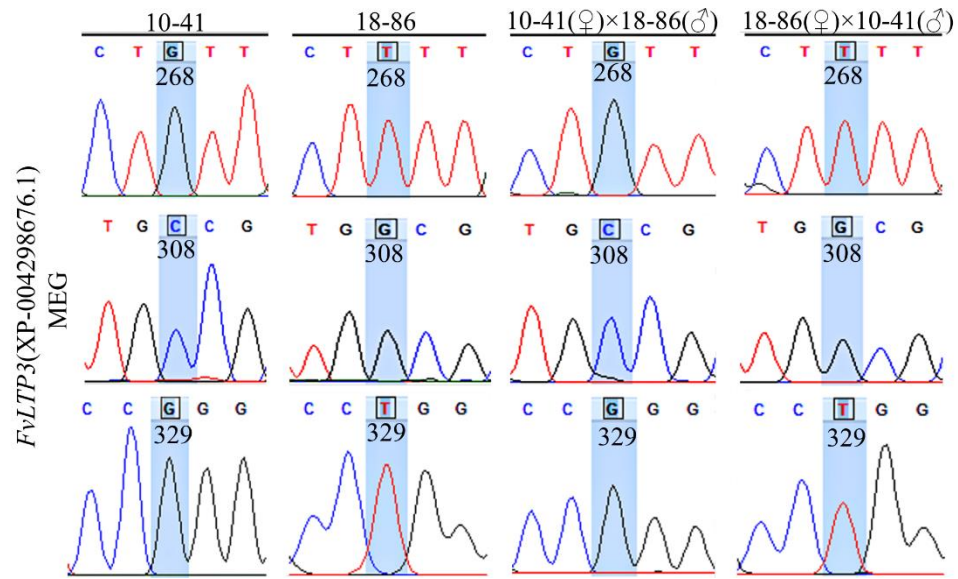

Figure S5. Monallelic expression of *FvLTP3* in reciprocal cross endosperm of two *Fragaria vesca* strains.

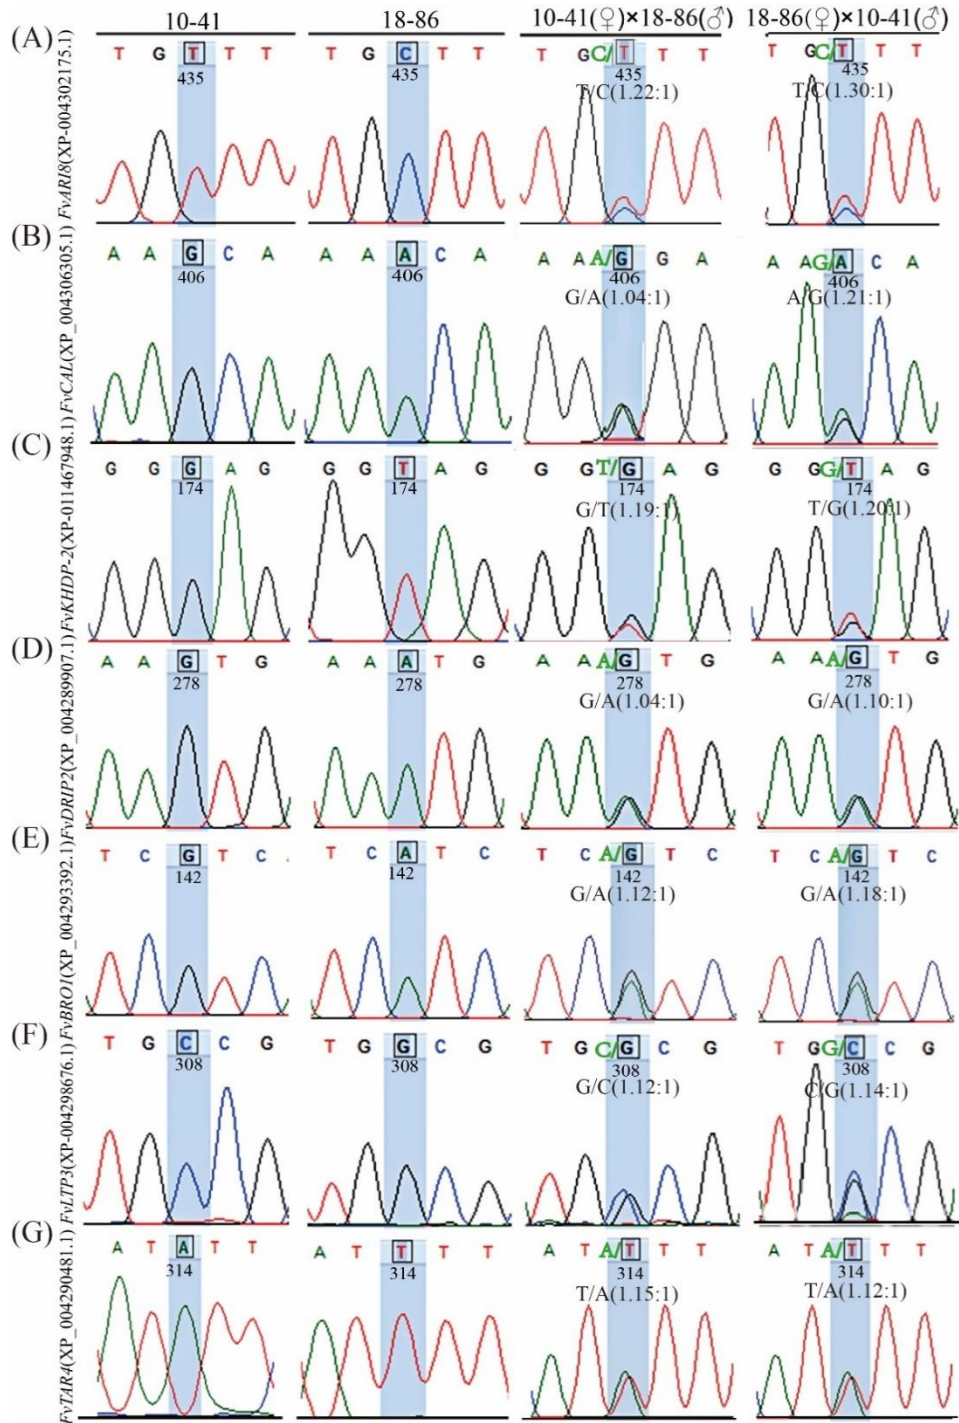

**Figure S6.** Biallelic expression of seven candidate genes in reciprocal cross embryo of two *Fragaria vesca* ecotypes. (A–G) Seven candidate genes with SNPs were cloned in reciprocal cross embryos, and sequencing showed that their variation ratio of SNPs is close to the 1:1 expected ratio. We only show part of the biallelic expression of SNPs, because there is enough to confirm that these candidate genes are not imprinted genes.
